# Supplementary material for: Population-Based Study of Incidence of Acute Abdominal Aortic Aneurysms With Projected Impact of Screening Strategy
Source: PubMed Central journal article supplement — J Am Heart Assoc. 2015 Aug 19;4(8):e001926. doi: 10.1161/JAHA.115.001926 (PMC4599457; doi:10.1161/jaha.115.001926), 2015-08-19
Supplement: jah30004-e001926-sd1.pdf [file jah30004-e001926-sd1.pdf]

## SUPPLEMENTAL MATERIAL

**Table S1: Extrapolated life expectancies for the general population and elective aneurysm repair survivors**

**Extrapolated IFoA and ONS Life expectancies (years)**

|                                                       | Men                  |                          |                    | Women                |                          |                    |
|-------------------------------------------------------|----------------------|--------------------------|--------------------|----------------------|--------------------------|--------------------|
|                                                       | Smokers <sup>#</sup> | Non-smokers <sup>#</sup> | Total <sup>*</sup> | Smokers <sup>#</sup> | Non-smokers <sup>#</sup> | Total <sup>*</sup> |
| <b>UK Population</b>                                  |                      |                          |                    |                      |                          |                    |
| 2010                                                  |                      |                          |                    |                      |                          |                    |
| 65yrs                                                 | 16.3                 | 22.2                     | 21.0               | 18.1                 | 24.8                     | 23.7               |
| 75yrs                                                 | 9.3                  | 13.5                     | 12.8               | 10.4                 | 15.4                     | 14.7               |
| 85yrs                                                 | 4.9                  | 6.9                      | 6.5                | 5.2                  | 7.6                      | 7.3                |
| 2020                                                  |                      |                          |                    |                      |                          |                    |
| 65yrs                                                 | 17.3                 | 23.4                     | 22.2               | 19.0                 | 26.1                     | 24.9               |
| 75yrs                                                 | 10.4                 | 15.0                     | 14.2               | 11.4                 | 16.9                     | 16.1               |
| 85yrs                                                 | 5.9                  | 8.3                      | 7.9                | 6.2                  | 9.2                      | 8.8                |
| 2030                                                  |                      |                          |                    |                      |                          |                    |
| 65yrs                                                 | 18.2                 | 24.7                     | 23.4               | 19.8                 | 27.2                     | 26.0               |
| 75yrs                                                 | 11.1                 | 16.0                     | 15.2               | 12.1                 | 17.8                     | 17.0               |
| 85yrs                                                 | 6.6                  | 9.3                      | 8.8                | 6.9                  | 10.2                     | 9.7                |
| <b>Elective Aneurysm Repair Survivors<sup>‡</sup></b> |                      |                          |                    |                      |                          |                    |
| 2010                                                  |                      |                          |                    |                      |                          |                    |
| 65yrs                                                 | 11.8                 | 16.0                     | 15.2               | 9.7                  | 13.3                     | 12.7               |
| 75yrs                                                 | 6.7                  | 9.8                      | 9.2                | 5.6                  | 8.3                      | 7.9                |
| 85yrs                                                 | 3.5                  | 5.0                      | 4.7                | 2.8                  | 4.1                      | 3.9                |
| 2020                                                  |                      |                          |                    |                      |                          |                    |
| 65yrs                                                 | 12.5                 | 16.9                     | 16.0               | 10.2                 | 14.0                     | 13.3               |
| 75yrs                                                 | 7.5                  | 10.8                     | 10.3               | 6.1                  | 9.0                      | 8.6                |
| 85yrs                                                 | 4.3                  | 6.0                      | 5.7                | 3.3                  | 4.9                      | 4.7                |
| 2030                                                  |                      |                          |                    |                      |                          |                    |
| 65yrs                                                 | 13.1                 | 17.8                     | 16.9               | 10.6                 | 14.6                     | 13.9               |
| 75yrs                                                 | 8.0                  | 11.6                     | 11.0               | 6.5                  | 9.5                      | 9.1                |
| 85yrs                                                 | 4.8                  | 6.7                      | 6.4                | 3.7                  | 5.4                      | 5.2                |

\*Based on ONS projections for all men and women at the appropriate age-bands

<sup>#</sup>Estimated by applying the current IFoA mortality rate variance for smokers and non-smokers at appropriate age-bands onto the ONS “total” projections

<sup>‡</sup>Based on data from Mani et al. 2009: 10 year survival (excluding 90 day post-operative mortality) following elective AAA repair compared to age and sex matched population controls (72.2% for men, 53.6% for women)

**Table S2: Current and projected life-years gained per year for the current screening strategy and potential alternatives**

| <b>Screening Strategy</b>                                                                                       | <b>2010</b> | <b>2020</b> | <b>2030</b> |
|-----------------------------------------------------------------------------------------------------------------|-------------|-------------|-------------|
| Annual AAA-related deaths                                                                                       | 3957        | 3860        | 4078        |
| AAA-related life-years lost                                                                                     | 21796       | 21348       | 21938       |
| <b>Current: Men aged 65</b>                                                                                     |             |             |             |
| AAA-related deaths prevented N (%)                                                                              | 221         | 144         | 87          |
| Life-years saved N (%)                                                                                          | 2606 (12.0) | 1795 (8.4)  | 1143 (5.2)  |
| Number of scans to save 1 year of life                                                                          | 121         | 181         | 369         |
| <b>ALTERNATIVE A: Men aged 65 current smokers + All Men aged 75</b>                                             |             |             |             |
| AAA-related deaths prevented N (%)                                                                              | 835         | 681         | 561         |
| Life-years saved N (%)                                                                                          | 7266 (33.3) | 6316 (29.6) | 5415 (24.7) |
| Number of scans to save 1 year of life                                                                          | 34          | 49          | 62          |
| <b>ALTERNATIVE B: Men aged 65 current smokers + All Men aged 75 + Women aged 75 with diagnosed hypertension</b> |             |             |             |
| AAA-related deaths prevented N (%)                                                                              | 985         | 813         | 686         |
| Life-years saved N (%)                                                                                          | 8219 (37.7) | 7235 (33.9) | 6333 (28.9) |
| Number of scans to save 1 year of life                                                                          | 41          | 58          | 71          |

**Table S3: Sensitivity analysis on the projected impact of screening programme alternative strategies on acute abdominal aortic events if incidence rates reduce by the same age-adjusted degree as they have for last decade**

|                                                            | <b>2010*</b> |             | <b>2020*</b> |             | <b>2030*</b> |             |
|------------------------------------------------------------|--------------|-------------|--------------|-------------|--------------|-------------|
| Total UK population ≥ 55 years                             | 17,646,359   |             | 20,861,307   |             | 23,923,713   |             |
| Annual AAA-related events                                  | 6905         |             | 6344         |             | 6372         |             |
| Length of Screening Efficacy (Yrs)                         | <b>10</b>    | <b>15</b>   | <b>10</b>    | <b>15</b>   | <b>10</b>    | <b>15</b>   |
| <b>SCREENING PROGRAMME</b>                                 |              |             |              |             |              |             |
| <b><i>All Men aged 65 and 75 and All Women aged 75</i></b> |              |             |              |             |              |             |
| Acute AAA events expected in screened population N (%)     | 3875 (56.1)  | 4990 (72.3) | 3064 (48.3)  | 4445 (70.1) | 2469 (38.7)  | 4262 (66.9) |
| Acute AAA events prevented N (%)                           | 1938 (28.1)  | 2495 (36.1) | 1532 (24.1)  | 2222 (35.0) | 1234 (19.4)  | 2131 (33.4) |
| Annual Scans                                               | 752,100      | 752,100     | 877,300      | 877,300     | 1004,900     | 1004,900    |
| Scans required to prevent 1 event                          | 388          | 301         | 573          | 395         | 814          | 472         |
| <b><i>All Men and All Women aged 75</i></b>                |              |             |              |             |              |             |
| Acute AAA events expected in screened population N (%)     | 2404 (34.8)  | 3518 (51.0) | 2103 (33.1)  | 3484 (54.9) | 1887 (29.6)  | 3680 (57.8) |
| Acute AAA events prevented N (%)                           | 1202 (17.4)  | 1759 (25.5) | 1051 (16.6)  | 1742 (27.5) | 944 (14.8)   | 1840 (28.9) |
| Annual Scans                                               | 436,900      | 436,900     | 551,900      | 551,900     | 583,200      | 583,200     |
| Scans required to prevent 1 event                          | 363          | 248         | 525          | 317         | 618          | 317         |
| <b><i>All hypertensive Women aged 75</i></b>               |              |             |              |             |              |             |
| Acute AAA events expected in screened population N (%)     | 524 (7.6)    | 948 (13.7)  | 460 (7.3)    | 951 (15.0)  | 437 (6.9)    | 1073 (16.8) |
| Acute AAA events prevented N (%)                           | 262 (3.8)    | 474 (6.9)   | 230 (3.6)    | 475 (7.5)   | 218 (3.4)    | 536 (8.4)   |
| Annual Scans                                               | 88,500       | 88,500      | 109,900      | 109,900     | 115,900      | 115,900     |
| Scans required to prevent 1 event                          | 338          | 187         | 478          | 231         | 532          | 216         |

Values are given as overall numbers with percentages in brackets unless otherwise stated

\*Incorporates 2010 UK population census and ONS Principal Population Projections for 2010 - 2030

**Table S4: Sensitivity analysis on the projected impact on aneurysm-related death for screening programme alternative strategies if incidence rates reduce by the same age-adjusted degree as they have for last decade**

|                                                            | <b>2010*</b> |             | <b>2020*</b> |             | <b>2030*</b> |             |
|------------------------------------------------------------|--------------|-------------|--------------|-------------|--------------|-------------|
| Total UK population ≥ 55 years                             | 17,646,359   |             | 20,861,307   |             | 23,923,713   |             |
| Annual AAA-related deaths                                  | 3957         |             | 3860         |             | 4078         |             |
| Length of Screening Efficacy (Yrs)                         | <b>10</b>    | <b>15</b>   | <b>10</b>    | <b>15</b>   | <b>10</b>    | <b>15</b>   |
| <b>SCREENING PROGRAMME</b>                                 |              |             |              |             |              |             |
| <b><i>All Men aged 65 and 75 and All Women aged 75</i></b> |              |             |              |             |              |             |
| AAA-related deaths expected in screened population N (%)   | 1970 (49.8)  | 2743 (69.3) | 1625 (42.1)  | 2593 (67.2) | 1372 (33.7)  | 2629 (64.5) |
| AAA-related deaths prevented N (%)                         | 985 (24.9)   | 1371 (34.7) | 813 (21.0)   | 1296 (33.6) | 686 (16.8)   | 1314 (32.2) |
| Annual Scans required                                      | 752,100      | 752,100     | 877,300      | 877,300     | 1004,900     | 1004,900    |
| Scans required to prevent 1 death                          | 764          | 549         | 1079         | 677         | 1465         | 765         |
| <b><i>All Men and All Women aged 75</i></b>                |              |             |              |             |              |             |
| AAA-related deaths expected in screened population N (%)   | 1528 (38.6)  | 2301 (58.2) | 1337 (34.6)  | 2305 (59.7) | 1198 (29.4)  | 2454 (60.2) |
| AAA-related deaths prevented N (%)                         | 764 (19.3)   | 1151 (29.1) | 669 (17.3)   | 1152 (29.9) | 599 (14.7)   | 1227 (30.1) |
| Annual Scans required                                      | 436,900      | 436,900     | 551,900      | 551,900     | 583,200      | 583,200     |
| Scans required to prevent 1 death                          | 571          | 380         | 825          | 479         | 974          | 475         |
| <b><i>All hypertensive Women aged 75</i></b>               |              |             |              |             |              |             |
| AAA-related deaths expected in screened population N (%)   | 300 (7.6)    | 554 (14.0)  | 263 (6.8)    | 557 (14.4)  | 250 (6.1)    | 631 (15.5)  |
| AAA-related deaths prevented N (%)                         | 150 (3.8)    | 277 (7.0)   | 131 (3.4)    | 279 (7.2)   | 125 (3.1)    | 316 (7.7)   |
| Annual Scans required                                      | 88,500       | 88,500      | 109,900      | 109,900     | 115,900      | 115,900     |
| Scans required to prevent 1 death                          | 590          | 319         | 839          | 394         | 927          | 367         |

**Table S5: Comparison of the presence of risk factors in those with acute events versus the background study population expressed as age-sex-adjusted risk ratios.**

| <b>Aged 55-74 yrs</b> | Risk Factor     | Event Group | Risk Factor | Study Population | RR    | 95%CI | p-value   |        |
|-----------------------|-----------------|-------------|-------------|------------------|-------|-------|-----------|--------|
| <b>Men</b>            |                 |             |             |                  |       |       |           |        |
|                       | Ever-smokers    | 27          | 28          | 4248             | 8717  | 1.98  | 1.84-2.13 | <0.001 |
|                       | Current smokers | 21          | 28          | 1492             | 8717  | 4.38  | 3.52-5.45 | <0.001 |
|                       | Hypertension    | 15          | 28          | 2755             | 8717  | 1.70  | 1.20-2.40 | 0.003  |
| <b>Women</b>          |                 |             |             |                  |       |       |           |        |
|                       | Ever-smokers    | 6           | 7           | 3604             | 8699  | 2.07  | 1.53-2.80 | <0.001 |
|                       | Current smokers | 3           | 7           | 1099             | 8699  | 3.39  | 1.44-7.99 | 0.005  |
|                       | Hypertension    | 6           | 7           | 2656             | 8699  | 2.81  | 2.07-3.81 | <0.001 |
| <b>Aged ≥ 75 yrs</b>  |                 |             |             |                  |       |       |           |        |
| <b>Men</b>            |                 |             |             |                  |       |       |           |        |
|                       | Ever-smokers    | 35          | 47          | 1616             | 2609  | 1.20  | 1.01-1.43 | 0.03   |
|                       | Current smokers | 8           | 47          | 416              | 2609  | 1.07  | 0.56-2.02 | 0.84   |
|                       | Hypertension    | 29          | 47          | 1399             | 2609  | 1.15  | 0.92-1.45 | 0.23   |
| <b>Women</b>          |                 |             |             |                  |       |       |           |        |
|                       | Ever-smokers    | 11          | 21          | 2012             | 3783  | 0.98  | 0.65-1.48 | 0.94   |
|                       | Current smokers | 3           | 21          | 537              | 3783  | 1.01  | 0.35-2.88 | 0.99   |
|                       | Hypertension    | 20          | 21          | 2144             | 3783  | 1.68  | 1.52-1.86 | <0.001 |
| <b>All ≥ 55 yrs</b>   |                 |             |             |                  |       |       |           |        |
| <b>Men</b>            |                 |             |             |                  |       |       |           |        |
|                       | Ever-smokers    | 62          | 75          | 5864             | 11326 | 1.60  | 1.44-1.77 | <0.001 |
|                       | Current smokers | 29          | 75          | 1908             | 11326 | 2.30  | 1.72-3.06 | <0.001 |
|                       | Hypertension    | 44          | 75          | 4154             | 11326 | 1.60  | 1.32-1.94 | <0.001 |
| <b>Women</b>          |                 |             |             |                  |       |       |           |        |
|                       | Ever-smokers    | 17          | 28          | 5616             | 12482 | 1.35  | 1.00-1.82 | 0.05   |
|                       | Current smokers | 6           | 28          | 1636             | 12482 | 1.63  | 0.80-3.33 | 0.18   |
|                       | Hypertension    | 26          | 28          | 4800             | 12482 | 2.41  | 2.17-2.68 | <0.001 |

**Table S6: OXVASC: Events and aneurysm-related mortality rates by age and risk factor status**

|                        | < 75 yrs   | 75-84 yrs  | ≥ 85 yrs   | P      | Total      |
|------------------------|------------|------------|------------|--------|------------|
| Events                 | 35         | 38         | 30         |        | 103        |
| Out-of-Hospital Death  | 6 (17.1%)  | 15 (39.5%) | 10 (33.3%) | 0.10   | 31 (30.1%) |
| Aneurysm-related Death | 14 (40.0%) | 25 (66.8%) | 22 (73.3%) | 0.01   | 61 (59.2%) |
| Male                   | 28 (80.0%) | 28 (73.7%) | 19 (63.3%) | 0.14   | 75 (72.8%) |
| Aneurysm-related Death | 10 (35.7%) | 19 (67.9%) | 16 (84.2%) | 0.002  | 45 (60.0%) |
| Female                 | 7 (20.0%)  | 10 (26.3%) | 11 (36.7%) | 0.14   | 28 (27.2%) |
| Aneurysm-related Death | 4 (57.1%)  | 6 (60.0%)  | 6 (54.5%)  | 0.97   | 16 (57.1%) |
| Ever-Smoked            | 33 (94.3%) | 27 (71.1%) | 19 (63.3%) | 0.008  | 79 (76.7%) |
| Aneurysm-related Death | 13 (39.4%) | 17 (63.0%) | 15 (78.9%) | 0.02   | 45 (57.0%) |
| Current Smokers        | 24 (68.6%) | 9 (23.7%)  | 2 (6.7%)   | <0.001 | 35 (34.0%) |
| Aneurysm-related Death | 8 (33.3%)  | 7 (77.8%)  | 1 (50.0%)  | 0.07   | 16 (45.7%) |
| Non-Smokers            | 2 (5.7%)   | 11 (28.9%) | 11 (23.3%) | 0.008  | 24 (23.3%) |
| Aneurysm-related Death | 1 (50.0%)  | 8 (72.7%)  | 7 (63.6%)  | 0.79   | 16 (66.7%) |
| Hypertensive           | 21 (60.0%) | 25 (65.8%) | 24 (80.0%) | 0.21   | 70 (68.0%) |
| Aneurysm-related Death | 9 (42.9%)  | 17 (68.0%) | 17 (70.8%) | 0.11   | 43 (61.4%) |
| Normotensive           | 14 (40.0%) | 13 (34.2%) | 6 (20.0%)  | 0.21   | 33 (32.0%) |
| Aneurysm-related Death | 5 (35.7%)  | 8 (61.5%)  | 5 (83.3%)  | 0.12   | 18 (54.5%) |

Current UK figures for aneurysm-related mortality following Elective AAA repair\*

|                        | < 75 yrs | 75-84 yrs | ≥ 85 yrs |
|------------------------|----------|-----------|----------|
| Aneurysm-related Death | 2%       | 4%        | 6%       |

**\*References**

Grant SW, Hickey GL, Grayson AD, Mitchell DC, McCollum CN. National risk prediction model for elective abdominal aortic aneurysm repair. *Br J Surg.* 2013; 100: 645-53.

Raval MV, Eskandari MK. Outcomes of elective abdominal aortic aneurysm repair among the elderly: endovascular versus open repair. *Surgery.* 2012; 151: 245-60.

Choke E, Lee K, McCarthy M, Nasim A, Naylor AR, Bown M, Sayers R. Risk models for mortality following elective open and endovascular abdominal aortic aneurysm repair: A single institution experience. *Eur J Vasc Endovasc Surg.* 2012;44:549-554.

Saratzis A, Mohamed S. Endovascular abdominal aortic aneurysm repair in the geriatric population. *J Geriatr Cardiol.* 2012; 9: 285-91

**Table S7: Changes in disability status for patients with incident acute events**

**Total population**

|                |       | 6M mRS |          |          |           | Total |
|----------------|-------|--------|----------|----------|-----------|-------|
|                |       | 0-2    | 3        | 4-5      | 6         |       |
| Pre-morbid mRS | 0-2   | 25     | <b>6</b> | <b>1</b> | <b>42</b> | 74    |
|                | 3     | 0      | 2        | <b>2</b> | <b>23</b> | 27    |
|                | 4-5   | 0      | 0        | 0        | <b>2</b>  | 2     |
|                | Total | 25     | 8        | 3        | 67        | 103   |

**Population aged <75**

|                |       | 6M mRS |          |          |           | Total |
|----------------|-------|--------|----------|----------|-----------|-------|
|                |       | 0-2    | 3        | 4-5      | 6         |       |
| Pre-morbid mRS | 0-2   | 18     | <b>1</b> | <b>0</b> | <b>13</b> | 32    |
|                | 3     | 0      | 0        | <b>0</b> | <b>3</b>  | 3     |
|                | 4-5   | 0      | 0        | 0        | <b>0</b>  | 0     |
|                | Total | 18     | 1        | 0        | 16        | 35    |

**Population aged 75-84**

|                |       | 6M mRS |          |          |           | Total |
|----------------|-------|--------|----------|----------|-----------|-------|
|                |       | 0-2    | 3        | 4-5      | 6         |       |
| Pre-morbid mRS | 0-2   | 5      | <b>1</b> | <b>1</b> | <b>19</b> | 26    |
|                | 3     | 0      | 1        | <b>2</b> | <b>8</b>  | 11    |
|                | 4-5   | 0      | 0        | 0        | <b>1</b>  | 1     |
|                | Total | 5      | 2        | 3        | 28        | 38    |

**Population aged ≥85**

|                |       | 6M mRS |          |          |           | Total |
|----------------|-------|--------|----------|----------|-----------|-------|
|                |       | 0-2    | 3        | 4-5      | 6         |       |
| Pre-morbid mRS | 0-2   | 2      | <b>4</b> | <b>0</b> | <b>10</b> | 16    |
|                | 3     | 0      | 1        | <b>0</b> | <b>12</b> | 13    |
|                | 4-5   | 0      | 0        | 0        | <b>1</b>  | 1     |
|                | Total | 2      | 5        | 0        | 23        | 30    |

**Table S8: Additional sensitivity analysis on the projected impact of the current UK screening programme on acute AAA events versus alternative strategies if cases with known AAAs are excluded (and incidence rates reduce by the same age-adjusted degree as they have for last decade)**

|                                                                                                                             | 2010*       |             | 2020*       |             | 2030*       |             |
|-----------------------------------------------------------------------------------------------------------------------------|-------------|-------------|-------------|-------------|-------------|-------------|
| Total UK population ≥ 55 years                                                                                              | 17,646,359  |             | 20,861,307  |             | 23,923,713  |             |
| Annual acute AAA events                                                                                                     | 6905        |             | 6344        |             | 6372        |             |
| Length of Screening Efficacy (Yrs)                                                                                          | <b>10</b>   | <b>15</b>   | <b>10</b>   | <b>15</b>   | <b>10</b>   | <b>15</b>   |
| <b>SCREENING PROGRAMME</b>                                                                                                  |             |             |             |             |             |             |
| <b>CURRENT: Men aged 65</b>                                                                                                 |             |             |             |             |             |             |
| Acute AAA events expected in screened population N (%)                                                                      | 1398 (20.3) | 2229 (32.3) | 912 (14.4)  | 1639 (25.8) | 552 (8.7)   | 1194 (18.7) |
| Acute AAA events prevented N (%)                                                                                            | 699 (10.1)  | 1115 (16.1) | 456 (7.2)   | 820 (12.9)  | 276 (4.3)   | 597 (9.4)   |
| Annual Scans                                                                                                                | 315,200     | 315,200     | 325,400     | 325,400     | 421,700     | 421,700     |
| Scans required to prevent 1 event                                                                                           | 451         | 283         | 714         | 397         | 1528        | 706         |
| <b>ALTERNATIVE A: Men aged 65 current smokers<sup>#</sup> + All Men aged 75</b>                                             |             |             |             |             |             |             |
| Acute AAA events expected in screened population N (%)                                                                      | 2840 (41.1) | 3359 (48.6) | 2222 (35.0) | 2895 (45.6) | 1748 (27.4) | 2623 (41.2) |
| Acute AAA events prevented N (%)                                                                                            | 1420 (20.6) | 1679 (24.3) | 1111 (17.5) | 1447 (22.8) | 874 (13.7)  | 1311 (20.6) |
| Annual Scans                                                                                                                | 247,900     | 247,900     | 307,200     | 307,200     | 336,800     | 336,800     |
| Scans required to prevent 1 event                                                                                           | 175         | 148         | 277         | 212         | 385         | 257         |
| <b>ALTERNATIVE B: Men aged 65 current smokers<sup>#</sup> + All Men aged 75 + Women aged 75 with diagnosed hypertension</b> |             |             |             |             |             |             |
| Acute AAA events expected in screened population N (%)                                                                      | 3289 (47.6) | 4368 (63.3) | 2616 (41.2) | 3633 (57.3) | 2123 (33.3) | 3442 (54.0) |
| Acute AAA events prevented N (%)                                                                                            | 1645 (23.8) | 2184 (31.6) | 1308 (20.6) | 1816 (28.7) | 1061 (16.7) | 1721 (27.0) |
| Annual Scans                                                                                                                | 336,400     | 336,400     | 417,200     | 417,200     | 452,700     | 452,700     |
| Scans required to prevent 1 event                                                                                           | 204         | 154         | 319         | 230         | 427         | 263         |

Values are given as overall numbers with percentages in brackets unless otherwise stated

\*Incorporates 2010 UK population census and ONS Principal Population Projections for 2010 - 2030

<sup>#</sup> Current smoking was defined as daily smoking within the previous 12 months.

**Table S9: Additional sensitivity analysis on the projected impact of the current UK screening programme on aneurysm-related deaths versus alternative strategies if cases with known prevalent AAAs already under surveillance are excluded (and incidence rates reduce by the same age-adjusted degree as they have for last decade)**

|                                                                                                                             | 2010*       |             | 2020*       |             | 2030*       |             |
|-----------------------------------------------------------------------------------------------------------------------------|-------------|-------------|-------------|-------------|-------------|-------------|
| Total UK population ≥ 55 years                                                                                              | 17,646,359  |             | 20,861,307  |             | 23,923,713  |             |
| Annual acute AAA events                                                                                                     | 3957        |             | 3860        |             | 4078        |             |
| Length of Screening Efficacy (Yrs)                                                                                          | <b>10</b>   | <b>15</b>   | <b>10</b>   | <b>15</b>   | <b>10</b>   | <b>15</b>   |
| <b>SCREENING PROGRAMME</b>                                                                                                  |             |             |             |             |             |             |
| <b>CURRENT: Men aged 65</b>                                                                                                 |             |             |             |             |             |             |
| Acute AAA events expected in screened population N (%)                                                                      | 368 (9.3)   | 946 (23.9)  | 240 (6.2)   | 746 (19.3)  | 145 (3.6)   | 592 (14.5)  |
| Acute AAA events prevented N (%)                                                                                            | 184 (4.6)   | 473 (12.0)  | 120 (3.1)   | 373 (9.7)   | 73 (1.8)    | 296 (7.3)   |
| Annual Scans                                                                                                                | 315,200     | 315,200     | 325,400     | 325,400     | 421,700     | 421,700     |
| Scans required to prevent 1 event                                                                                           | 1713        | 666         | 2712        | 872         | 5777        | 1425        |
| <b>ALTERNATIVE A: Men aged 65 current smokers<sup>#</sup> + All Men aged 75</b>                                             |             |             |             |             |             |             |
| Acute AAA events expected in screened population N (%)                                                                      | 1749 (44.2) | 1957 (49.5) | 1251 (32.4) | 1812 (46.9) | 1038 (25.5) | 1767 (43.3) |
| Acute AAA events prevented N (%)                                                                                            | 875 (22.1)  | 978 (24.7)  | 626 (16.2)  | 906 (23.5)  | 519 (12.7)  | 883 (21.7)  |
| Annual Scans                                                                                                                | 247,900     | 247,900     | 307,200     | 307,200     | 336,800     | 336,800     |
| Scans required to prevent 1 event                                                                                           | 283         | 253         | 491         | 339         | 649         | 381         |
| <b>ALTERNATIVE B: Men aged 65 current smokers<sup>#</sup> + All Men aged 75 + Women aged 75 with diagnosed hypertension</b> |             |             |             |             |             |             |
| Acute AAA events expected in screened population N (%)                                                                      | 1749 (44.2) | 2351 (59.4) | 1448 (37.5) | 2206 (57.1) | 1225 (30.0) | 2208 (54.2) |
| Acute AAA events prevented N (%)                                                                                            | 875 (22.1)  | 1175 (29.7) | 724 (18.8)  | 1103 (28.6) | 613 (15.0)  | 1104 (27.1) |
| Annual Scans                                                                                                                | 336,400     | 336,400     | 417,200     | 417,200     | 452,700     | 452,700     |
| Scans required to prevent 1 event                                                                                           | 384         | 286         | 576         | 378         | 738         | 410         |

Values are given as overall numbers with percentages in brackets unless otherwise stated

\*Incorporates 2010 UK population census and ONS Principal Population Projections for 2010 - 2030

<sup>#</sup> Current smoking was defined as daily smoking within the previous 12 months.
